# Supplementary material
Source: publisher figshare collection journal article supplement (https://sage.figshare.com/ndownloader/files/13316480)
Supplement: Supplementary file 1 [file 13316480]

## Survey Questions

**Q1. How many years have you been in practice?**

**Q2. What was the location of your medical training?**

- Canada
- US
- Other

**Q3. What is the level of your certification?**

- CCFP
- CCFP (EM)
- CCFP (Anesthesia)
- FRCPC
- Other

**Q4. Your training is best described by which of the following**

- Family Medicine
- Emergency Medicine
- Anesthesia
- Medicine
- Surgery

**Q5. What best describes your centre of practice?**

- Rural
- Urban (Non-Academic)
- Urban (Academic)
- Other

**Q6. What is the approximate amount number of intubations you perform or supervise on critically ill patients per year?**

- 0
- <20
- 20-50
- >50

**Q7. Etomidate is usually easily accessible at my centre**

- Agree
- Disagree
- Don't know

**Q8. For the following questions please choose one best answer.**

a. The single dose use of etomidate tends to cause adrenal suppression in septic patients  
Strongly Agree, Agree, Neither agree or disagree, Disagree, Strongly disagree, Don't Know

b. When administering etomidate to non-critically ill patients, it is important to co-administer corticosteroids.  
Strongly Agree, Agree, Neither agree or disagree, Disagree, Strongly disagree, Don't Know

c. In patients with septic shock, the benefit of etomidate's hemodynamic profile outweighs the risk of adrenal suppression  
Strongly Agree, Agree, Neither agree or disagree, Disagree, Strongly disagree, Don't Know

d. In patients with septic shock, the use of etomidate over other induction drugs will result in increased mortality.

Strongly Agree, Agree, Neither agree or disagree, Disagree, Strongly disagree, Don't Know

**Q9. For the following questions about specific patient populations, please choose one best answer.**

- a. Etomidate is my induction agent of choice for RAPID SEQUENCE INTUBATION.  
Strongly Agree, Agree, Neither agree or disagree, Disagree, Strongly disagree
- b. Etomidate is my induction agent of choice for NON-CRITICALLY ILL patients requiring intubation.  
Strongly Agree, Agree, Neither agree or disagree, Disagree, Strongly disagree
- c. Etomidate is my induction agent of choice for HEMODYNAMICALLY UNSTABLE patients in general.  
Strongly Agree, Agree, Neither agree or disagree, Disagree, Strongly disagree
- d. Etomidate is my agent of choice in patients presenting with UNDIFFERENTIATED HYPOTENSION.  
Strongly Agree, Agree, Neither agree or disagree, Disagree, Strongly disagree
- e. Etomidate is my agent of choice for HEMODYNAMICALLY UNSTABLE TRAUMA patients.  
Strongly Agree, Agree, Neither agree or disagree, Disagree, Strongly disagree
- f. Etomidate is my agent of choice for patients with SEPTIC SHOCK.  
Strongly Agree, Agree, Neither agree or disagree, Disagree, Strongly disagree

**Q10. For the follow patient populations, please choose your preferred agent or combination of agents for RSI.**

- a. My preferred agent(s) for RSI in SEPTIC patients is/are  
Propofol, Etomidate, Ketamine, Midazolam, Fentanyl, Thiopentol, Methohexital, Other
- b. My preferred agent(s) for RSI in TRAUMA patients is/are  
Propofol, Etomidate, Ketamine, Midazolam, Fentanyl, Thiopentol, Methohexital, Other
- c. My preferred agent(s) for RSI in INTOXICATED patients is/are  
Propofol, Etomidate, Ketamine, Midazolam, Fentanyl, Thiopentol, Methohexital, Other
- d. My preferred agent(s) for RSI in patients PRESENTING WITH CARDIOGENIC SHOCK is/are  
Propofol, Etomidate, Ketamine, Midazolam, Fentanyl, Thiopentol, Methohexital, Other
- e. My preferred agent(s) for RSI in PATIENTS PRESENTING WITH UNDIFFERENTIATED SHOCK is/are  
Propofol, Etomidate, Ketamine, Midazolam, Fentanyl, Thiopentol, Methohexital, Other

**Q11. For the following questions, please choose one best answer.**

- a. The controversy about the use of etomidate as an induction agent in septic shock is of significant clinical importance.  
Strongly Agree, Agree, Neither agree or disagree, Disagree, Strongly disagree, Don't Know
- b. The controversy has already been well resolved in the literature.  
Strongly Agree, Agree, Neither agree or disagree, Disagree, Strongly disagree, Don't Know
- c. The literature supports the use of etomidate in septic patients.  
Strongly Agree, Agree, Neither agree or disagree, Disagree, Strongly disagree, Don't Know
- d. The literature supports the avoidance of etomidate in septic patients.  
Strongly Agree, Agree, Neither agree or disagree, Disagree, Strongly disagree, Don't Know
